# Supplementary material
Source: Springer Nature journal article supplement (https://www.springermedizin.de/resource/supplementary/12889_2007_1040_MOESM1_ESM.pdf/9503192)
Supplement: MOESM1 [file 9503192]

Factors (i.e. social support, clear goals) that promote Lack of Confidence in Self-Care Implementation

```
graph LR; A[Factors (i.e. social support, clear goals) that promote Lack of Confidence in Self-Care Implementation] --> B[Self-Care Implementation (i.e. eating a healthier diet, being more physically active)]; B --> C[Glycemic Control];
```

Self-Care Implementation (i.e. eating a healthier diet, being more physically active)

Glycemic Control
